# Supplementary material
Source: Springer Nature journal article supplement (https://www.springermedizin.de/resource/supplementary/12967_2013_1732_MOESM8_ESM.pdf/9575180)

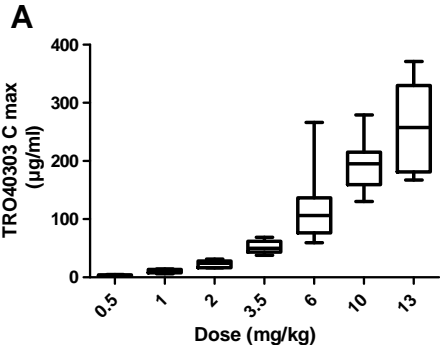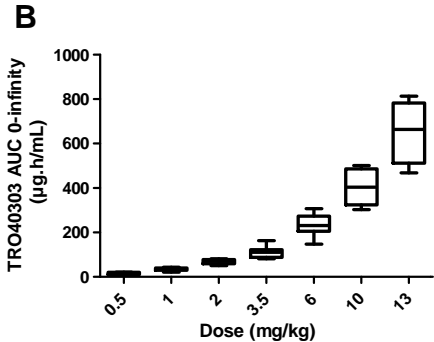

Supplement: MOESM8 [file 9575180]
